# Supplementary material for: Autophagy is associated with chemoresistance in neuroblastoma
Source: PubMed Central journal article supplement (PMC5109645; doi:10.1186/s12885-016-2906-9), 2016-11-15
Supplement: 12885_2016_2906_MOESM1_ESM.pdf [file 12885_2016_2906_MOESM1_ESM.pdf]

**Figure S1**

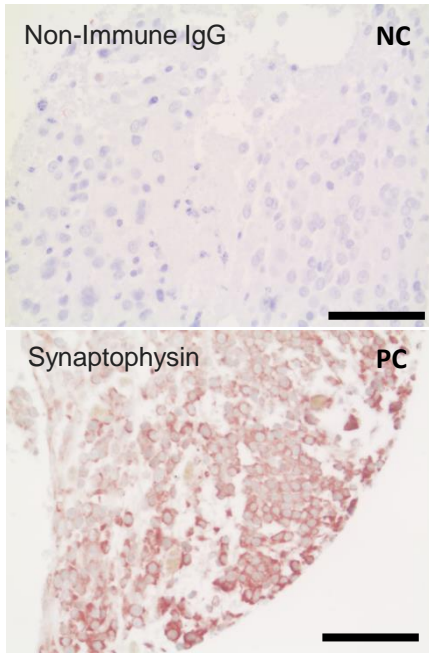

**Scale bar = 100  $\mu$ m**

NC: Negative control  
PC: Positive control
