# Supplementary material for: Autophagy is associated with chemoresistance in neuroblastoma
Source: Springer Nature journal article supplement (doi:10.1186/s12885-016-2906-9), 2016-11-15

A)

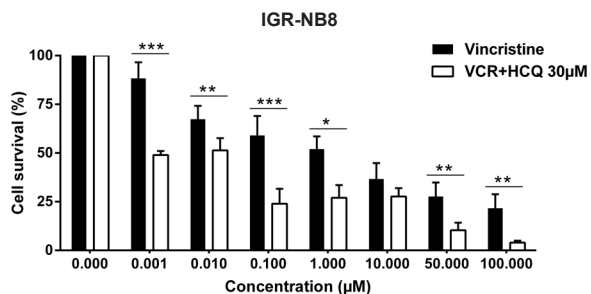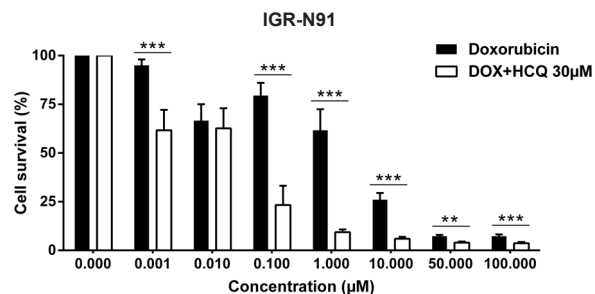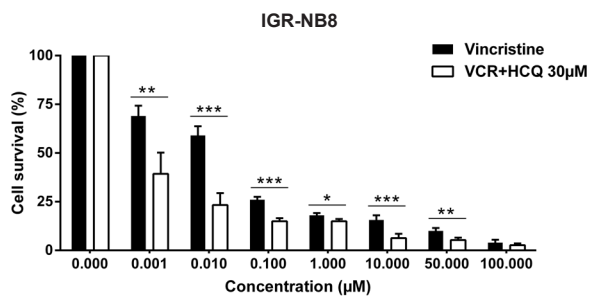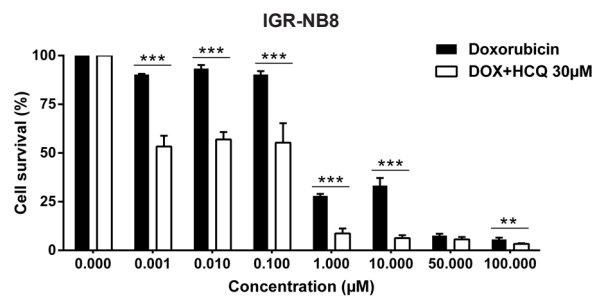

B)

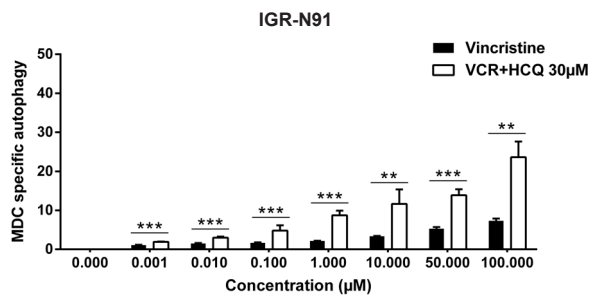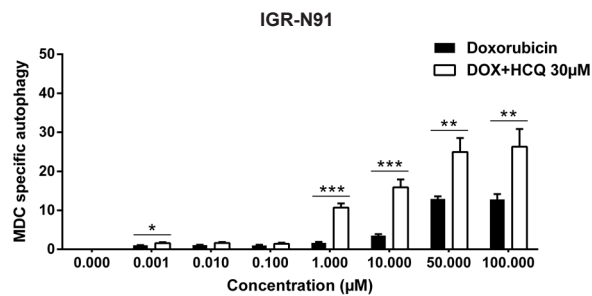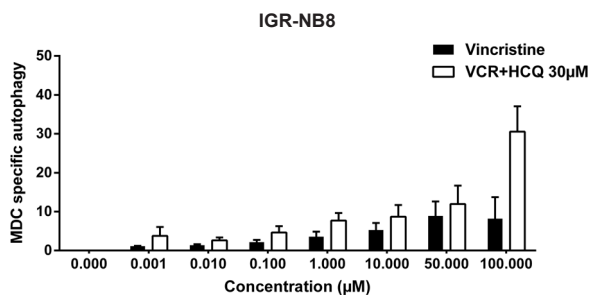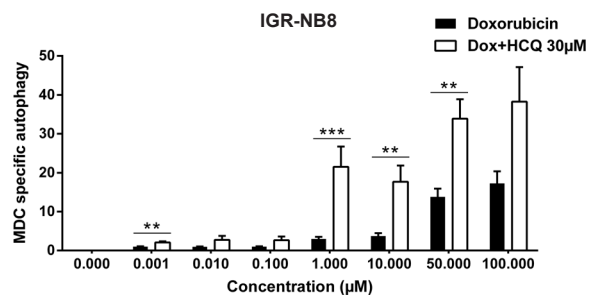

Supplement: MOESM3 [file 11048744]
