# Supplementary material for: Autophagy is associated with chemoresistance in neuroblastoma
Source: Springer Nature journal article supplement (doi:10.1186/s12885-016-2906-9), 2016-11-15

A)

| Cells injected                            | Developed tumors | Tumor latency (days) | Treatment 5 days            | Number of tumors/group | Tumor volume (mm <sup>3</sup> ) at day 6 |
|-------------------------------------------|------------------|----------------------|-----------------------------|------------------------|------------------------------------------|
| SheGFP Cells                              | 11/12            | 34.5                 | Saline                      | 6                      | 1392.1                                   |
|                                           |                  |                      | Vincristine (0.4 mg/kg/day) | 5                      | 891.6                                    |
| ShATG5 ( <i>ATG5<sup>kd</sup></i> ) Cells | 3/12             | 36.3                 | Saline                      | 2                      | 883.9                                    |
|                                           |                  |                      | Vincristine (0.4 mg/kg/day) | 1                      | 659.3                                    |

B)

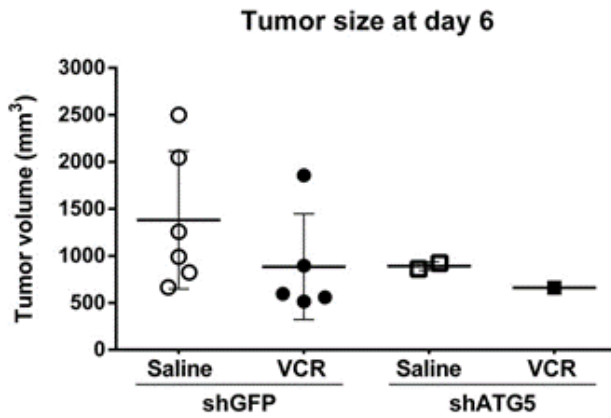

C)

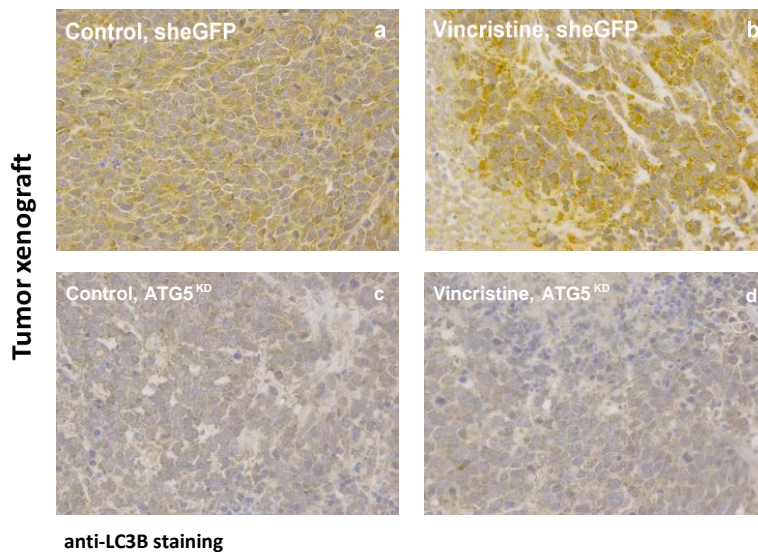

Supplement: MOESM4 [file 11048744]
